# Supplementary material for: mRNA dynamics and alternative conformations adopted under low and high arginine concentrations control polyamine biosynthesis in Salmonella
Source: PubMed Central journal article supplement (PMC6386406; doi:10.1371/journal.pgen.1007646), 2019-02-11

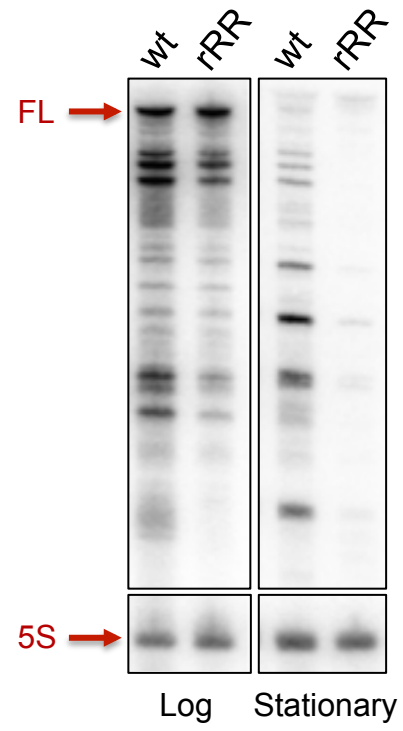

Supplement: pgen.1007646.s008.pdf [file pgen.1007646.s008.pdf]
